# Supplementary material for: Fluconazole Monotherapy Is a Suboptimal Option for Initial Treatment of Cryptococcal Meningitis Because of Emergence of Resistance
Source: PubMed Central journal article supplement (PMC6890991; doi:10.1128/mbio.02575-19), 2019-12-03

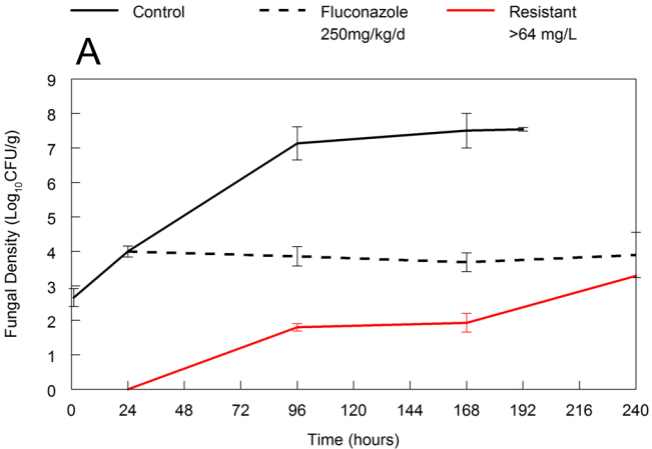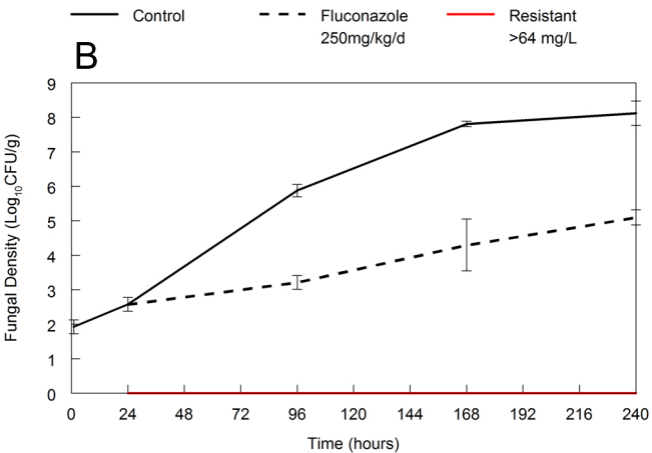

Supplement: mBio.02575-19-sf002.pdf [file mBio.02575-19-sf002.pdf]
